1 *ENOX1, CCDC122 AND LACC1* ROLE IN PROGRESSION OF PROSTATE CANCER <sup>1</sup>

2

3 Author list

4 Timothy Ongaba<sup>1\*</sup>

5 <sup>1</sup>School of Science and Technology

6 Nottingham Trent University

7 Clifton Campus

8 Clifton Lane

9 Nottingham

10 NG11 8NS

11 United Kingdom

12 Email: [dextertim5@gmail.com](mailto:dextertim5@gmail.com)

13

14 **Abstract**

15 Prostate cancer (PCa) continues to trend among top 3 cancers that kill men over 20 years in  
16 the United Kingdom and worldwide despite extensive research and resources directed  
17 towards its treatment and prevention. In the application of a hallmark of survival  
18 mechanisms by the cancer, our study used mRNA seq data to identify genes that are  
19 increasingly mutated with progressing PCa from a cohort of 491 PCa patients. We found  
20 that *ENOX1*, *CCDC122* and *LACC1* deep deletion was positively associated with increasing  
21 age of diagnosis. Pathway analysis of enriched genes, following their deep deletion  
22 identified estrogen biosynthesis, KSRP signalling, omega 3 and 6 fatty acid biosynthesis  
23 and, Rap1 signalling as the top 5 enriched pathways. Previous individual and combined role  
24 of these genes in PCa progression was not fully established but thanks to this study, these  
25 pathways could be druggable targets in PCa patients with these gene deep deletions.

26 **Introduction**

27 **Background to the investigation**

28 Prostate cancer (PCa) is the most frequently diagnosed cancer in men in 132 countries with a  
29 7.3% incidence worldwide. It is the second cause of cancer deaths in men in 48 of 185 sampled  
30 countries worldwide<sup>1,2</sup>. One in 8 men will be diagnosed with prostate cancer in the UK while one  
31 dies from the disease every 45 minutes. The number of PCa cases are projected to rise by 15%  
32 in the UK between 2023 to 2025 indicating an ever-increasing trend<sup>3</sup>.

33

34 PCa starts *in-situ* within the prostate where it can, but not always, metastasize to the lymph  
35 nodes, bone, lung, liver and even as far as the brain when left untreated<sup>4</sup>. PCa can be termed  
36 localised when it remains within the prostate or metastatic when it spreads beyond the prostate.  
37 Localised PCa becomes high risk based on clinical staging, biochemical recurrence and a high  
38 Gleason score<sup>5</sup>. While still localised but more often when metastasised, PCa can progress from  
39 hormone sensitive to refractory phenotype with increasing resistance to treatment and  
40 decreasing survival rate from 30% over 5 to 30% over 3 years patient survival<sup>6</sup>.

41 When metastasised, the disease can be categorised as metastatic castration-sensitive prostate  
42 cancer (mCSPC) when clinical deprivation of androgens halts cancer advancement. The disease  
43 is termed castration-resistant prostate cancer (mCRPC) when cancer continues to progress even  
44 in the absence of androgens. The risk of fatality significantly increases when PCa becomes  
45 castration resistant<sup>5</sup>.

46

47 The incidence of PCa increases with age starting at 45, steeply rising and peaking around 75 to  
48 79 years. Patient survival is dependent on regular screening recommended to start at 45 years,  
49 early diagnosis and treatment intervention which might include chemotherapy, radiotherapy,  
50 surgical resection of tumours, immunotherapy or gland ablation to reduce the role of androgens  
51 in disease progression<sup>3,7,8</sup>.

52

53 Tumour Mutational Burden (TMB) of PCa, the somatic cell rate of mutation per mega base pair  
54 has been associated with low response to chemotherapy, high biochemical recurrence and,  
55 generally poor prognosis. These together with other cofounders such as poor immune cell  
56 infiltration into the tumour microenvironment, and androgen receptor status quickly lead to  
57 reduced survival of affected individuals<sup>9-11</sup>.

58 Among tumour mutations are gene deletions that can also appear as copy number alterations.  
59 Many of these, as deep deletions at chromosome 13q have been previously linked to poor  
60 prognosis in prostate cancer, high Gleason scores and biochemical recurrence<sup>12</sup>

61 Conversely, the high TMB also brings about high immunogenicity and, therefore, better response  
62 to immunotherapy<sup>10,13</sup>. This could, however apply to mutations in which the change in gene  
63 sequence produces a more antigenic protein product detectable by the affected individual. A  
64 deletion would lead to structural or functional alteration of the translated protein product.

65

66 Some of the most implicated genes in PCa are those involved in cell cycle progression, receptor  
67 signalling, proto-oncogenes, and or tumour suppressors. Among these, *UBE2C*, *PLK1*, *CDC20*,  
68 *BUB1*, *CDK1* and *HJURP* are top 6 linked to disease progression, metastasis and, poor  
69 prognosis<sup>9,10</sup>.

70  
71 Ecto-NOX Disulfide-Thiol Exchanger 1 (*ENOX1*), also known as cCNOX, CNOX, FLJ10094, and  
72 PIG38, is a copper-binding protein expressed in endothelial and other cells where it has NADH  
73 oxidase activity, promotes angiogenesis and is a potential druggable target<sup>14–16</sup>. It is one of the  
74 genes on the 13q chromosome arm whose deletion is associated with poor prognosis, early  
75 biochemical recurrence and metastasis<sup>12,17</sup>.

76 *ENOX1* has been negatively associated with prostate cancer, which is characterized by structural  
77 rearrangements, most frequently including translocations between androgen-dependent genes  
78 and other genes<sup>18</sup>. The Protein Atlas shows that *ENOX1* is expressed in cancer tissue, including  
79 prostate cancer<sup>19,20</sup>. *ENOX1* shares a 66% sequence identity with *ENOX2* of the same protein  
80 family with demonstrated contribution to gastric cancer cell growth and survival<sup>21</sup>. The exact role  
81 of *ENOX1* in prostate cancer is, however, not fully understood, and further research is needed to  
82 determine its functions and prognostic values<sup>16</sup>.

83  
84 Coiled-Coil Domain Containing 122 (*CCDC122*) is a gene that is overexpressed in prostate  
85 cancer as compared to healthy prostate tissue<sup>22,23</sup>. There is generally limited literature linking the  
86 gene or its products to prostate cancer and this warrants further studies following its differential  
87 expression and or mutation during the progression of disease. Single nucleotide polymorphisms  
88 in the gene have previously been linked to development of leprosy in case controlled cohorts of  
89 Chinese and Brazilian populations<sup>24,25</sup>.

90  
91 The Laccase Domain-Containing 1 (*LACC1*) gene is a gene that encodes an oxidoreductase that  
92 promotes fatty-acid oxidation, with concomitant inflammasome activation, mitochondrial and  
93 NADPH-oxidase-dependent reactive oxygen species production, and anti-bacterial responses in  
94 macrophages<sup>22,26–29</sup>. In relation to prostate cancer, a transcriptome analysis of differentially  
95 expressed genes in methotrexate-resistant prostate cancer found that *LACC1* was one of the  
96 genes that was differentially expressed<sup>30</sup>. A study aimed at identifying biomarkers for the  
97 management of human prostate cancer also found that *LACC1* was one of the genes that was  
98 differentially expressed in prostate cancer tissue compared to normal tissue<sup>31</sup>. Data from the TNM  
99 plot shows a reduced expression of the gene in prostate cancer compared to normal prostate  
100 tissue<sup>23</sup>. *LACC1* has also been linked to Leprosy in similar studies as *CCDC122*<sup>24,25</sup>.

101

## 102 **Materials and Methods**

### 103 **Data retrieval from cbiportal**

104 Using mRNA Seq data from the Prostate adenocarcinoma (TCGA Firehose Legacy) in cbiportal  
105 (<https://www.cbiportal.org/>), we examined quartiles of increasing age at time of diagnosis to  
106 identify what genes are incrementally altered with increasing age of diagnosis<sup>32</sup>.

107

### 108 **Genomic alteration analysis of *ENOX1*, *CCDC122* and *LACC1*.**

109 Of 491 samples/patients that had mRNA expression z-scores relative to all samples (log mRNA  
110 Seq V2 RSEM) we used the onco query language “*ENOX1*: HOMDEL, *CCDC122*: HOMDEL,  
111 *LACC1*: HOMDEL” as the user defined list, the mRNA expression z-score relative to all samples,  
112 in addition to putative copy number alteration from GISTIC and mutations were queried from the  
113 study samples with mutation and Copy Number Alteration (CNA) data.

114 The z-score threshold was left at  $\pm 2.0$ . All other parameters were left as default.

115

116 Effect of *ENOX1*, *CCDC122* and *LACC1* in PCa

117 We examined mRNA seq data Z-score relative to all genes for patients that had deep deletions  
118 for each of the three genes to compare their individual and combined effect on the survival of  
119 PCa patients as overall survival.

120

121 Relationship analysis for *ENOX1*, *CCDC122* and *LACC1*.

122 Using data from String database (available at <https://string-db.org/>) the three protein names  
123 were searched for under the “Multiple proteins” tab for “*Homo sapiens*” as the organism<sup>33</sup>.

124

### 125 **Pathway analysis using Enrichr and Reactome**

126 To examine what genes are upregulated following the deep deletion of the three genes, we found  
127 patient samples’ mRNA expression (RNA Seq V2 RSEM) (491 samples) data that had at least  
128 one deep deletion of *ENOX1*, *CCDC122* and *LACC1* (altered group of 81) and those with deep  
129 deletions of all three genes (unaltered).

130 As our interest was pathway analysis of genes implicated with deep deletion of all 3 genes  
131 (*ENOX1*, *CCDC122* and *LACC1*), we selected for the “unaltered” gene category list with  
132 statistically significant expression (95%CI) and ordered these by descending log<sub>2</sub> ratio of the z-  
133 score absolute values then by ascending p-value. All 432 genes were used as input for pathway  
134 analysis in Enrichr (<https://maayanlab.cloud/Enrichr/>) and later Reactome (<https://reactome.org/>)  
135 for cross reference<sup>34,35</sup>. The gene names were pasted in both analysis webpages and all  
136 parameters were left as default in the analysis tab.

137 Individual gene deep deletion effect on physiological pathways was not considered for analysis  
138 as patient data showed a multigene effect compounding disease status.

139

140 In Enricher, the most up-to-date manually curated pathway reference database and the highest  
141 combined score for the top 4 pathways identified were chosen as the best reference database for  
142 pathway analysis of the set of 432 genes.

143

### 144 **Statistical analysis**

145 All statistical analysis was done within cbiportal.

146

147

## 148 **Results**

### 149 **Data retrieval /overview of Prostate Adenocarcinoma study (TCGA, Firehose Legacy).**

150 To examine for genes increasingly mutated with progressing disease, we chose a cohort of PCa  
151 patients with a wide range of age at time of diagnosis and Gleason primary and secondary  
152 patterns. Our chosen patient cohort with mRNA seq data for 498 patient samples suited well for  
153 downstream analyses for PCa genomic analysis. (Figure1).

154

155 **Figure 1| Wide scope of age of diagnosis and Gleason scores.** A shows age class boundaries of  
156 patients diagnosed with PCa. B represents different primary whereas C shows the secondary Gleason  
157 patterns making up different Gleason scores of PCa in patients.

158  
 159 Differential gene mutation with increasing age  
 160 Increasing age quartiles of PCa diagnosed patients showed differential genomic alterations.  
 161 Three of the genomically altered genes; *ENOX1*, *CCDC122* and *LACC1* had increasing gene  
 162 deep deletions with increasing age at time of diagnosis with 0.0883, 0.146 and 0.146 p-values  
 163 respectively. (Figure 2)

164 All three genes were located on the 13q14.11 cytogenetic band having a deep deletion mutation.  
 165  
 166 **Figure 2| Genomically altered genes with increasing age quartiles** *ENOX1*, *CCDC122* and *LACC1*  
 167 are increasingly altered with increasing age of diagnosis.

168  
 169 **Genomic alteration analysis of *ENOX1*, *CCDC122* and *LACC1*.**

170 Sixteen percent (16%) of the 491 patient cohort had deep deletions of all three genes. All the  
 171 three gene deep deletions had a co-occurrence tendency with p-values all less than 0.001 (95%  
 172 CI) (Table1).

173  
 174 **Table 1| *ENOX1*, *CCDC122* and *LACC1* are concurrently deleted in in 491 patient samples**

| A                          | B                          | Neither | A Not B | B Not A | Both | Log2 Odds Ratio | p-Value | q-Value | Tendency      |
|----------------------------|----------------------------|---------|---------|---------|------|-----------------|---------|---------|---------------|
| <i>ENOX1</i> :<br>HOMDEL   | <i>CCDC122</i> :<br>HOMDEL | 412     | 0       | 0       | 79   | >3              | <0.001  | <0.001  | Co-occurrence |
| <i>CCDC122</i> :<br>HOMDEL | <i>LACC1</i> :<br>HOMDEL   | 410     | 2       | 0       | 79   | >3              | <0.001  | <0.001  | Co-occurrence |
| <i>ENOX1</i> :<br>HOMDEL   | <i>LACC1</i> :<br>HOMDEL   | 410     | 2       | 0       | 79   | >3              | <0.001  | <0.001  | Co-occurrence |

175  
 176 Analysis of any mutational data on the 3 genes irrespective of expression profile showed no  
 177 patient had any mutation in the protein product of any of the (Supplementary figure 1)

178  
 179 **Effect of *ENOX1*, *CCDC122* and *LACC1* deep deletion in PCa**

180 There was no significant difference in overall survival between patient who had a deep deletion  
 181 and those who had an amplification of all three genes on a Kaplan-Meier plot (Supplementary  
 182 figure 2)

183  
 184 **Relationship analysis for *ENOX1*, *CCDC122* and *LACC1*.**

185 *CCDC122* and *LACC1* proteins were found to be co-expressed with in addition to text mining  
 186 results. *ENOX1*, had no shown relationship with either gene (Figure 3).

187  
 188 **Figure 3| *ENOX1* has not protein relationship with, *LACC1* and *CCDC122* which were liked with evidence**  
 189 **of co-expression and text mining The three putative interactions were circled in red (*LACC1* and**  
 190 ***CCDC122*) and black(*ENOX1*).**

191  
 192 **Pathway analysis using Enrichr and Reactome.**

193 Reactome2022 was the database with the highest combined scores and most up-to-date in  
 194 Enrichr pathway analysis. The individual gene deep deletion implicated pathways were identical  
 195 between *LACC1* and *CCDC122* with *ENOX1* having a more alike effect to the combined effect of

196 all three gene deep deletions.

197 The top 5 identified pathways ranking first by descending combined score then by ascending p-  
 198 value for all three genes' deep deletion were estrogen biosynthesis, KH-type splicing regulatory  
 199 protein(KSRP), alpha linoleic and linoleic acid metabolism, and Rap1 signalling with  
 200 114.62,110.08,82.59,67.35,56.94(2dp) combine scores respectively (Table 2).

201

202 **Table 2|** Top five upregulated genes were from estrogen biosynthesis, KSRP activity, omega 3  
 203 and, 6 and, Rap1 signalling pathway.

| Index | Name/Pathway Identifier                                                         | P-value         | Odds Ratio  | Combined score  | Genes overlap                 |
|-------|---------------------------------------------------------------------------------|-----------------|-------------|-----------------|-------------------------------|
| 1     | Estrogen Biosynthesis<br>R-HSA-193144                                           | <b>0.006562</b> | 22.8030303  | <b>114.6185</b> | <i>AKR1B15;CYP19A1</i>        |
| 2     | KSRP (KHSRP) Binds and Destabilizes mRNA<br>R-HSA-450604                        | <b>4.05E-04</b> | 14.09187534 | <b>110.0775</b> | <i>DIS3;EXOSC8;PARN;YWHAZ</i> |
| 3     | Alpha-Linolenic (Omega3) And Linoleic (Omega6) Acid Metabolism<br>R-HSA-2046104 | <b>0.00242</b>  | 13.70957944 | <b>82.58704</b> | <i>ELOVL1;MUSK;SYCP2</i>      |
| 4     | Linoleic Acid (LA) Metabolism<br>R-HSA-2046105                                  | <b>0.011904</b> | 15.2004662  | <b>67.3514</b>  | <i>ELOVL1;MUSK</i>            |
| 5     | Rap1 Signalling<br>R-HSA-392517                                                 | <b>0.004516</b> | 10.5442128  | <b>56.93941</b> | <i>RAP1B;RAP1A;YWHAZ</i>      |

204

205 Results from Reactome corroborated the same pathways as identified by Enrichr displaying  
 206 genes that overlapped with those from known pathways (False Discovery Rate (FDR)<0.001).  
 207 The top two of these with respective overlapping genes were highlighted (Figure 4). 184 genes  
 208 were not mapped to any pathway by Reactome.

209

210 **Figure 4|** Gene's overlap (coloured yellow) between query genes mapped to known pathways by  
 211 Reactome. Top is the estrogen biosynthesis pathway and bottom is the KSRP binding and destabilisation  
 212 of mRNA pathway.

213

## 214 **Discussion**

215 Our study aimed to identify some of the most prevalent genomic alterations and or differentially  
 216 expressed genes throughout the progression of disease. As age at diagnosis is often positively  
 217 correlated and had previously been found to be linked with disease progression and poor  
 218 prognosis, we examined quartiles of ages of patients diagnosed with prostate cancer to identify  
 219 those genes whose alteration frequency was increasing with age and Gleason  
 220 score(Figure1)<sup>36,37</sup>.

221 Whereas the development and progression of prostate cancer is not pivotal on a single or only  
222 genomic mutations, we observed roles such as structural alterations and fusions attributed to  
223 *TPMRSS2* gene and other chromosome 13q gene deletions among a hallmark of other factors  
224 PCa employs to develop, evade and progress in an individual. *ENOX1*, one of our identified  
225 genes is found on the same chromosome arm and we were able to identify its combined role with  
226 *CCDC122* and *LACC1* within the same cytogenetic band of 13q14.11 in progression of PCa as  
227 coexpression<sup>38,39</sup>.

228

229 All the top 5 pathways implicated by upregulated genes following deep deletion of *ENOX1*,  
230 *LACC1* and, *CCDC122* have been previously linked to cancer progression and give insight on  
231 the beneficial effect of the three gene deletion to prostate cancer cell survival and disease  
232 progression. The enriched pathways as a result of all three gene deletions were identical to those  
233 enriched by *ENOX1* single gene deletion alone whereas single gene deletion of *LACC1* and  
234 *CCDC122* had the same not identical effect to the pathways enriched by all three gene deletions  
235 (Supplementary figure 3). This suggests that the overall observed enriched pathways were more  
236 as a result of single gene deletion of *ENOX1* that either or both of *LACC1* and *CCDC122*.

237 Estrogen has been shown to play a role in the development and progression of prostate cancer  
238 through its receptor activation on PCa cells that promotes cell proliferation and survival<sup>40-42</sup>.

239 Estrogen can stimulate the production of growth factors and cytokines that promote angiogenesis  
240 and tumour growth<sup>40,41,43</sup>. Estrogen can inhibit the androgen receptor (AR) signalling pathway,  
241 and this is important for prostate cancer growth and survival<sup>40,43</sup>.

242

243 KSRP (KH-type splicing regulatory protein) is an RNA-binding protein that has been shown to  
244 promote tumour growth and metastasis in non-small cell lung, breast, ovarian and, prostate  
245 cancer<sup>44</sup>. A study on castration-resistant prostate cancer showed that KSRP regulates type III  
246 interferon expression post-transcriptionally, which is an important axis in the progression of  
247 prostate cancer especially in advanced stage<sup>45</sup>. KSRP is also known to regulate gene expression  
248 on various levels, including gene transcription, mRNA decay, and microRNA precursor  
249 maturation<sup>44</sup>. In colorectal cancer, enhanced expression of KSRP was found in tumour tissue and  
250 was associated with worse overall survival. KSRP seemed to drive epithelial cell proliferation in  
251 primary and metastatic cells through control of cell cycle progression and promoted angiogenesis  
252 by enhancing vascular endothelial growth factor<sup>46</sup>.

253

254 Omega-3 and omega-6 fatty acids play a crucial role in the development and progression of  
255 prostate cancer. High amounts of omega-6 fatty acids have been linked with an increased risk of  
256 prostate cancer, whereas omega-3 fatty acids have been shown to inhibit prostate cancer  
257 growth<sup>47</sup>. A study on athymic mouse xenograft model simulating radical prostatectomy showed  
258 that prostate tumours can be modulated by the manipulation of omega-6:omega-3 ratios through  
259 diet, and the omega-3 fatty acid stearidonic acid (SDA) (precursor of eicosapentaenoic acid  
260 (EPA)) can inhibit prostate tumour growth and recurrence<sup>48</sup>. However, a study found that high  
261 intake of omega-3 fats in the blood is linked to an increased risk of prostate cancer<sup>49</sup>. Another  
262 study showed that there were no significant associations between specific omega-3 or omega-6  
263 PUFA intakes and overall prostate cancer risk<sup>50</sup>. Our current findings show a beneficial role of  
264 these two essential acids in PCa.

265  
266 Ras-proximate-1 (Rap1) signalling has been shown to play a role in prostate cancer metastasis  
267 and invasion<sup>51-53</sup>. Specifically, Rap1 promotes tumour progression by disrupting E-cadherin-  
268 mediated cell adhesion, leading to a reduction in E-cadherin<sup>54</sup>. Activation of Rap1 has also been  
269 shown to increase prostate cancer cell migration and invasion through the  $\alpha 4$ ,  $\beta 3$ , and  $\alpha v\beta 3$   
270 integrins<sup>53</sup>. Additionally, a study found that miR-203 down-regulates Rap1A and subsequently  
271 suppresses cell proliferation, adhesion, and invasion in prostate cancer<sup>53</sup>. These studies  
272 summatively suggest Rap1 contributes to PCa metastasis and, invasion in patients through  
273 several pathways

274  
275 Whereas our initial supposition was that *ENOX1*, *LACC1* and *CCDC122* were increasingly  
276 expressed to benefit PCa, our findings show that their deletion instead enriches genes that  
277 achieve the same outcome of PCa cell growth and survival.

278 The novelty in our findings is the link between the three identified genes whose combined  
279 deletions enriches genes in in PCa cell benefiting pathways for disease cell growth and survival.  
280 The three gene protein products, however, have positive physiological body functions so it is  
281 putative that on deletion, redundant functionality from similar proteins whose deletion would be  
282 detrimental to PCa cells is employed as a substitute.

283  
284 For a wet lab proof of concept, future work might involve use of PCa cell lines (RWPE-1, LNCaP,  
285 PC3, DU145) demonstrating different stage progression or stem cells of the disease and  
286 screening for the three genes using fluorescent *in-situ* hybridisation technique under the  
287 expectation of decreasing fluorescence with advancing disease.

288 As a therapeutic target for PCa and personalised therapy, judicious targeting of rate limiting  
289 steps/enzymes in the identified pathways could be explored as a treatment option should the  
290 side effect not outweigh the clinical benefit of the intervention.

291  
292 **Acknowledgments.**

293 Special appreciation to Dr. Amanda Coutts (P.H.d) and the School of Science and Technology  
294 for the guidance and resources used in executing this work.

295  
296 **References**

- 297 1. Sung, H. *et al.* Global Cancer Statistics 2020: GLOBOCAN Estimates of Incidence and Mortality  
298 Worldwide for 36 Cancers in 185 Countries. *CA. Cancer J. Clin.* **71**, 209–249 (2021).
- 299 2. Chhikara, B. S. & Parang, K. Global Cancer Statistics 2022: the trends projection analysis. *Chem.*  
300 *Biol. Lett.* **10**, Vol. 10 No. 1 (2023) (2023).
- 301 3. Prostate cancer incidence statistics | Cancer Research UK.  
302 [https://www.cancerresearchuk.org/health-professional/cancer-statistics/statistics-by-cancer-](https://www.cancerresearchuk.org/health-professional/cancer-statistics/statistics-by-cancer-type/prostate-cancer/incidence#heading=Three)  
303 [type/prostate-cancer/incidence#heading=Three](https://www.cancerresearchuk.org/health-professional/cancer-statistics/statistics-by-cancer-type/prostate-cancer/incidence#heading=Three) (2023).
- 304 4. Hatzoglou, V. *et al.* Brain Metastases from Prostate Cancer: An 11-Year Analysis in the MRI Era  
305 with Emphasis on Imaging Characteristics, Incidence, and Prognosis. *J. Neuroimaging* **24**, 166–  
306 166 (2014).
- 307 5. Caster, J. M., Falchook, A. D., Hendrix, L. H. & Chen, R. C. Risk of pathologic upgrading or locally  
308 advanced disease in early prostate cancer patients based on biopsy gleason score and PSA: A  
309 population-based study of modern patients. *Int. J. Radiat. Oncol. Biol. Phys.* (2015)  
310 doi:10.1016/j.ijrobp.2015.01.051.
- 311 6. Carroll, P. H. & Mohler, J. L. NCCN guidelines updates: Prostate cancer and prostate cancer



- 312 early detection. *JNCCN J. Natl. Compr. Cancer Netw.* **16**, 620–623 (2018).
- 313 7. Held-Warmkessel, J. Treatment of advanced prostate cancer. *Semin. Oncol. Nurs.* **17**, 118–128  
314 (2001).
- 315 8. Nanus, D. M. *et al.* Clinical use of monoclonal antibody HuJ591 therapy: Targeting prostate  
316 specific membrane antigen. in *Journal of Urology* (2003). doi:10.1097/01.ju.0000095151.97404.7c.
- 317 9. Luo, C., Chen, J. & Chen, L. Exploration of gene expression profiles and immune  
318 microenvironment between high and low tumor mutation burden groups in prostate cancer. *Int.*  
319 *Immunopharmacol.* **86**, (2020).
- 320 10. Wang, L., Pan, S., Zhu, B., Yu, Z. & Wang, W. Comprehensive analysis of tumour mutational  
321 burden and its clinical significance in prostate cancer. *BMC Urol.* **21**, 1–10 (2021).
- 322 11. Lawlor, R. T. *et al.* Tumor mutational burden as a potential biomarker for immunotherapy in  
323 pancreatic cancer: Systematic review and still-open questions. *Cancers (Basel).* **13**, (2021).
- 324 12. Kluth, M. *et al.* 13Q Deletion Is Linked To an Adverse Phenotype and Poor Prognosis in Prostate  
325 Cancer. *Genes Chromosom. Cancer* **57**, 504–512 (2018).
- 326 13. Chalmers, Z. R. *et al.* Analysis of 100,000 human cancer genomes reveals the landscape of  
327 tumor mutational burden. *Genome Med.* **9**, (2017).
- 328 14. Venkateswaran, A. *et al.* The NADH Oxidase ENOX1, a Critical Mediator of Endothelial Cell  
329 Radiosensitization, Is Crucial for Vascular Development. *Cancer Res.* **74**, 38–43 (2014).
- 330 15. Jiang, Z., Gorenstein, N. M., Morr , D. M. & James Morr , D. Molecular cloning and  
331 characterization of a candidate human growth-related and time-keeping constitutive cell surface  
332 hydroquinone (NADH) oxidase. *Biochemistry* **47**, 14028–14038 (2008).
- 333 16. Wu, Y. *et al.* Identification of the Functions and Prognostic Values of RNA Binding Proteins in  
334 Bladder Cancer. *Front. Genet.* **12**, 1–19 (2021).
- 335 17. Science for Life laboratory, K. I. NM\_001347969.2(ENOX1):c.759\_765del (p.Ser254fs) AND  
336 Malignant tumor of prostate - ClinVar - NCBI. <https://www.ncbi.nlm.nih.gov/clinvar/RCV000149057/>  
337 (2023).
- 338 18. Kluth, M. *et al.* Prevalence of chromosomal rearrangements involving non-ETS genes in prostate  
339 cancer. *Int. J. Oncol.* **46**, 1637–1642 (2015).
- 340 19. Uhlen, M. *et al.* A pathology atlas of the human cancer transcriptome. *Science (80-. ).* **357**,  
341 (2017).
- 342 20. Expression of ENOX1 in cancer - Summary - The Human Protein Atlas.  
343 <https://www.proteinatlas.org/ENSG00000120658-ENOX1/pathology> (2023).
- 344 21. Cheng, H. L., Lee, Y. H., Yuan, T. M., Chen, S. W. & Chueh, P. J. Update on a tumor-associated  
345 NADH oxidase in gastric cancer cell growth. *World J. Gastroenterol.* **22**, 2900–2905 (2016).
- 346 22. Safran, M. *et al.* GeneCards™ 2002: towards a complete, object-oriented, human gene  
347 compendium. *Bioinformatics* **18**, 1542–1543 (2002).
- 348 23. Bartha,  ., Gy, B. & Orffy,  . Molecular Sciences TNMplot.com: A Web Tool for the Comparison of  
349 Gene Expression in Normal, Tumor and Metastatic Tissues. (2021) doi:10.3390/ijms22052622.
- 350 24. Xiong, J. H. *et al.* Association between genetic variants in NOD2, C13orf31, and CCDC122 genes  
351 and leprosy among the Chinese Yi population. *Int. J. Dermatol.* **55**, 65–69 (2016).
- 352 25. Leturiondo, A. L. *et al.* Association of NOD2 and IFNG single nucleotide polymorphisms with  
353 leprosy in the Amazon ethnic admixed population. *PLoS Negl. Trop. Dis.* **14**, 1–13 (2020).
- 354 26. Fagerberg, L. *et al.* Analysis of the Human Tissue-specific Expression by Genome-wide  
355 Integration of Transcriptomics and Antibody-based Proteomics\* □ S. (2013)  
356 doi:10.1074/mcp.M113.035600.
- 357 27. LACC1 Gene - GeneCards | LACC1 Protein | LACC1 Antibody. [https://www.genecards.org/cgi-](https://www.genecards.org/cgi-bin/carddisp.pl?gene=LACC1)  
358 [bin/carddisp.pl?gene=LACC1](https://www.genecards.org/cgi-bin/carddisp.pl?gene=LACC1) (2023).
- 359 28. Lahiri, A., Hedl, M., Yan, J. & Abraham, C. Human LACC1 increases innate receptor-induced  
360 responses and a LACC1 disease-risk variant modulates these outcomes. *Nat. Commun.* **8**, (2017).
- 361 29. Huang, C., Hedl, M., Ranjan, K. & Abraham, C. LACC1 Required for NOD2-Induced, ER Stress-  
362 Mediated Innate Immune Outcomes in Human Macrophages and LACC1 Risk Variants Modulate  
363 These Outcomes. *Cell Rep.* **29**, 4525 (2019).
- 364 30. Li, S. *et al.* Transcriptome analysis of differentially expressed genes and pathways associated  
365 with mitoxantrone treatment prostate cancer. *J. Cell. Mol. Med.* **23**, 1987–2000 (2019).

- 366 31. Luca, B.-A. Identification of biomarkers for the management of human prostate cancer. (2017).  
367 32. Gao, J. *et al.* Integrative analysis of complex cancer genomics and clinical profiles using the  
368 cBioPortal. *Sci. Signal.* **6**, (2013).  
369 33. Szklarczyk, D. *et al.* STRING v11: protein-protein association networks with increased coverage,  
370 supporting functional discovery in genome-wide experimental datasets. *Nucleic Acids Res.* **47**,  
371 D607–D613 (2019).  
372 34. Kuleshov, M. V *et al.* Enrichr: a comprehensive gene set enrichment analysis web server 2016  
373 update. *Nucleic Acids Res.* **44**, W90–W97 (2016).  
374 35. Gillespie, M. *et al.* The reactome pathway knowledgebase 2022. *Nucleic Acids Res.* **50**, (2021).  
375 36. Pettersson, A. *et al.* Age at diagnosis and prostate cancer treatment and prognosis: a population-  
376 based cohort study. *Ann. Oncol.* **29**, 377–385 (2018).  
377 37. Cooney, M. M., Okuku, F. & Orem, J. Prostate Cancer Burden at the Uganda Cancer Institute. **2**,  
378 181–185 (2019).  
379 38. Perner, S. *et al.* TMPRSS2-ERG fusion prostate cancer: An early molecular event associated with  
380 invasion. *Am. J. Surg. Pathol.* **31**, 882–888 (2007).  
381 39. Braun, M. ERG rearrangement is specific to prostate cancer and does not occur in any other  
382 common tumor. (2012).  
383 40. Bosland, M. C. SELECTIVE ESTROGEN RECEPTOR MODULATORS The Role of Estrogens in  
384 Prostate Carcinogenesis: A Rationale for Chemoprevention. *Rev. Urol.* **7**, (2005).  
385 41. Ramírez-de-Arellano, A. *et al.* Distribution and Effects of Estrogen Receptors in Prostate Cancer:  
386 Associated Molecular Mechanisms. *Front. Endocrinol. (Lausanne)*. **12**, 811578 (2022).  
387 42. Malaguartera, R. *et al.* estrogens and Their Receptors in Prostate Cancer: Therapeutic  
388 implications. **8**, (2018).  
389 43. Nelles, J. L., Hu, W.-Y. & Prins, G. S. Estrogen action and prostate cancer. (2011)  
390 doi:10.1586/eem.11.20.  
391 44. Gherzi, R., Chen, C. Y., Trabucchi, M., Ramos, A. & Briata, P. The role of KSRP in mRNA decay  
392 and microRNA precursor maturation. *Wiley Interdiscip. Rev. RNA* **1**, 230–239 (2010).  
393 45. Schmidtke, L. *et al.* The KH-type splicing regulatory protein (KSRP) regulates type III interferon  
394 expression post-transcriptionally. *Biochem. J.* **476**, 333–352 (2019).  
395 46. Palzer, K. A. *et al.* The Role of KH-Type Splicing Regulatory Protein (KSRP) for Immune  
396 Functions and Tumorigenesis. *Cells* **11**, (2022).  
397 47. Apte, S. A., Cavazos, D. A., Whelan, K. A. & Degraffenried, L. A. A low dietary ratio of omega-6  
398 to omega-3 Fatty acids may delay progression of prostate cancer. *Nutr. Cancer* **65**, 556–562  
399 (2013).  
400 48. Kelavkar, U. P. *et al.* Prostate tumor growth and recurrence can be modulated by the omega-  
401 6:omega-3 ratio in diet: athymic mouse xenograft model simulating radical prostatectomy.  
402 *Neoplasia* **8**, 112–124 (2006).  
403 49. Brasky, T. M. *et al.* Plasma Phospholipid Fatty Acids and Prostate cancer risk in the Select trial.  
404 **105**, (2013).  
405 50. Huerta-Yépez, S., Tirado-Rodríguez, A. B. & Hankinson, O. Role of diets rich in omega-3 and  
406 omega-6 in the development of cancer. *Bol. Med. Hosp. Infant. Mex.* **73**, 446–456 (2016).  
407 51. Zhang, Y. L., Wang, R. C., Cheng, K., Ring, B. Z. & Su, L. Roles of Rap1 signaling in tumor cell  
408 migration and invasion. *Cancer Biol. Med.* **14**, 90–99 (2017).  
409 52. Bailey, C. L., Kelly, P. & Casey, P. J. Activation of Rap1 Promotes Prostate Cancer Metastasis.  
410 *Cancer Res.* **69**, 4962 (2009).  
411 53. Jaśkiewicz, A., Pajka, B. & Orzechowski, A. The many faces of rap1 GTPase. *Int. J. Mol. Sci.* **19**,  
412 1–20 (2018).  
413 54. Looi, C. K., Hii, L. W., Ngai, S. C., Leong, C. O. & Mai, C. W. The Role of Ras-Associated Protein  
414 1 (Rap1) in Cancer: Bad Actor or Good Player? *Biomedicines* **8**, (2020).

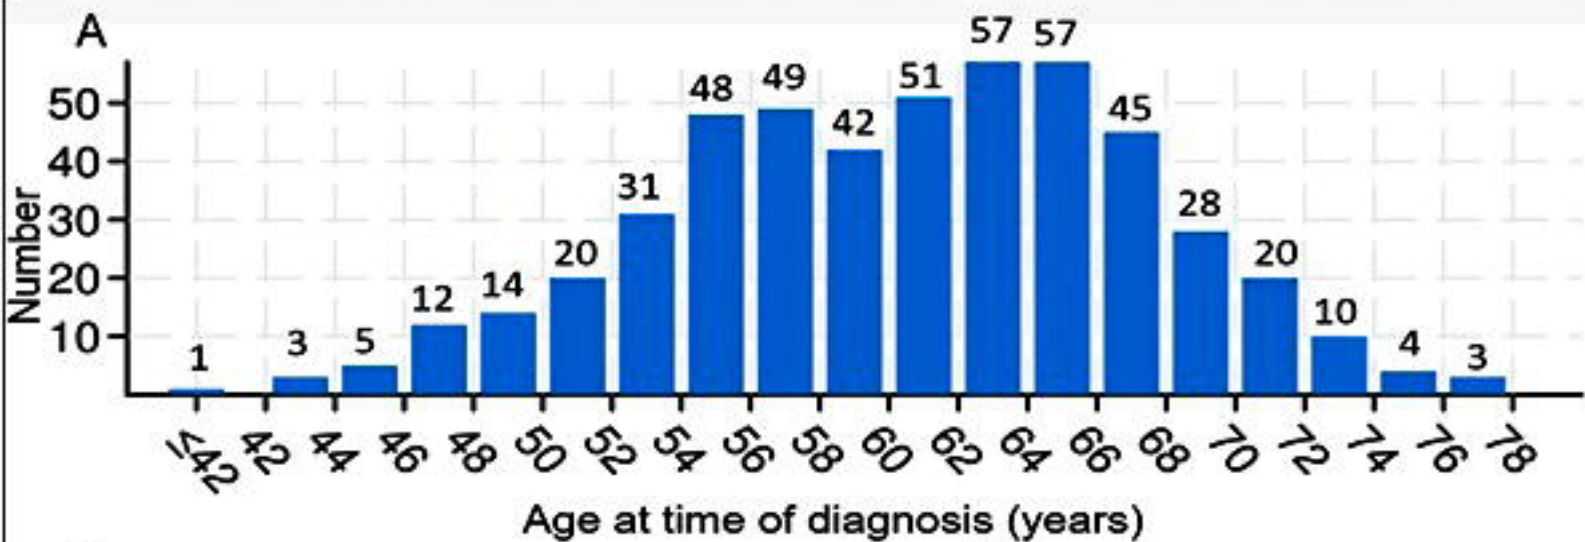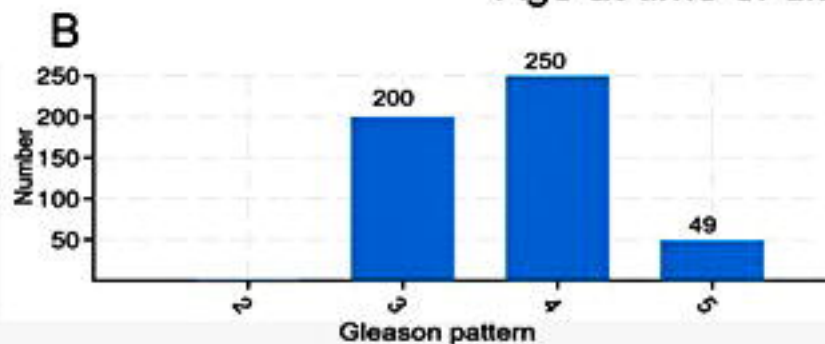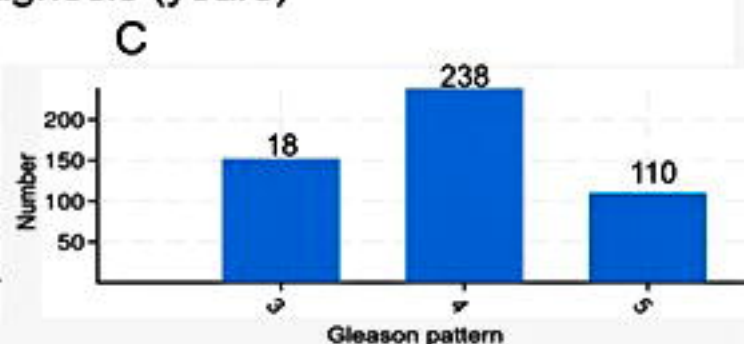

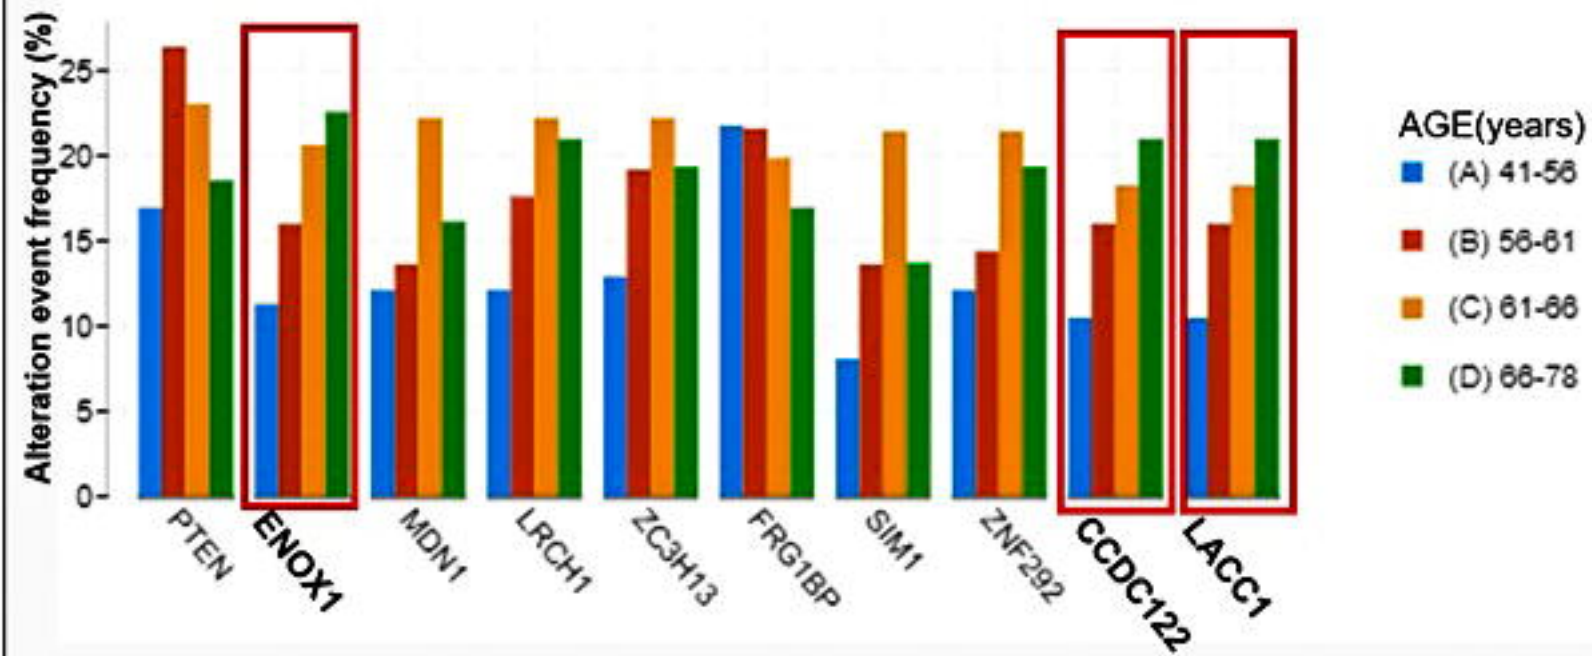

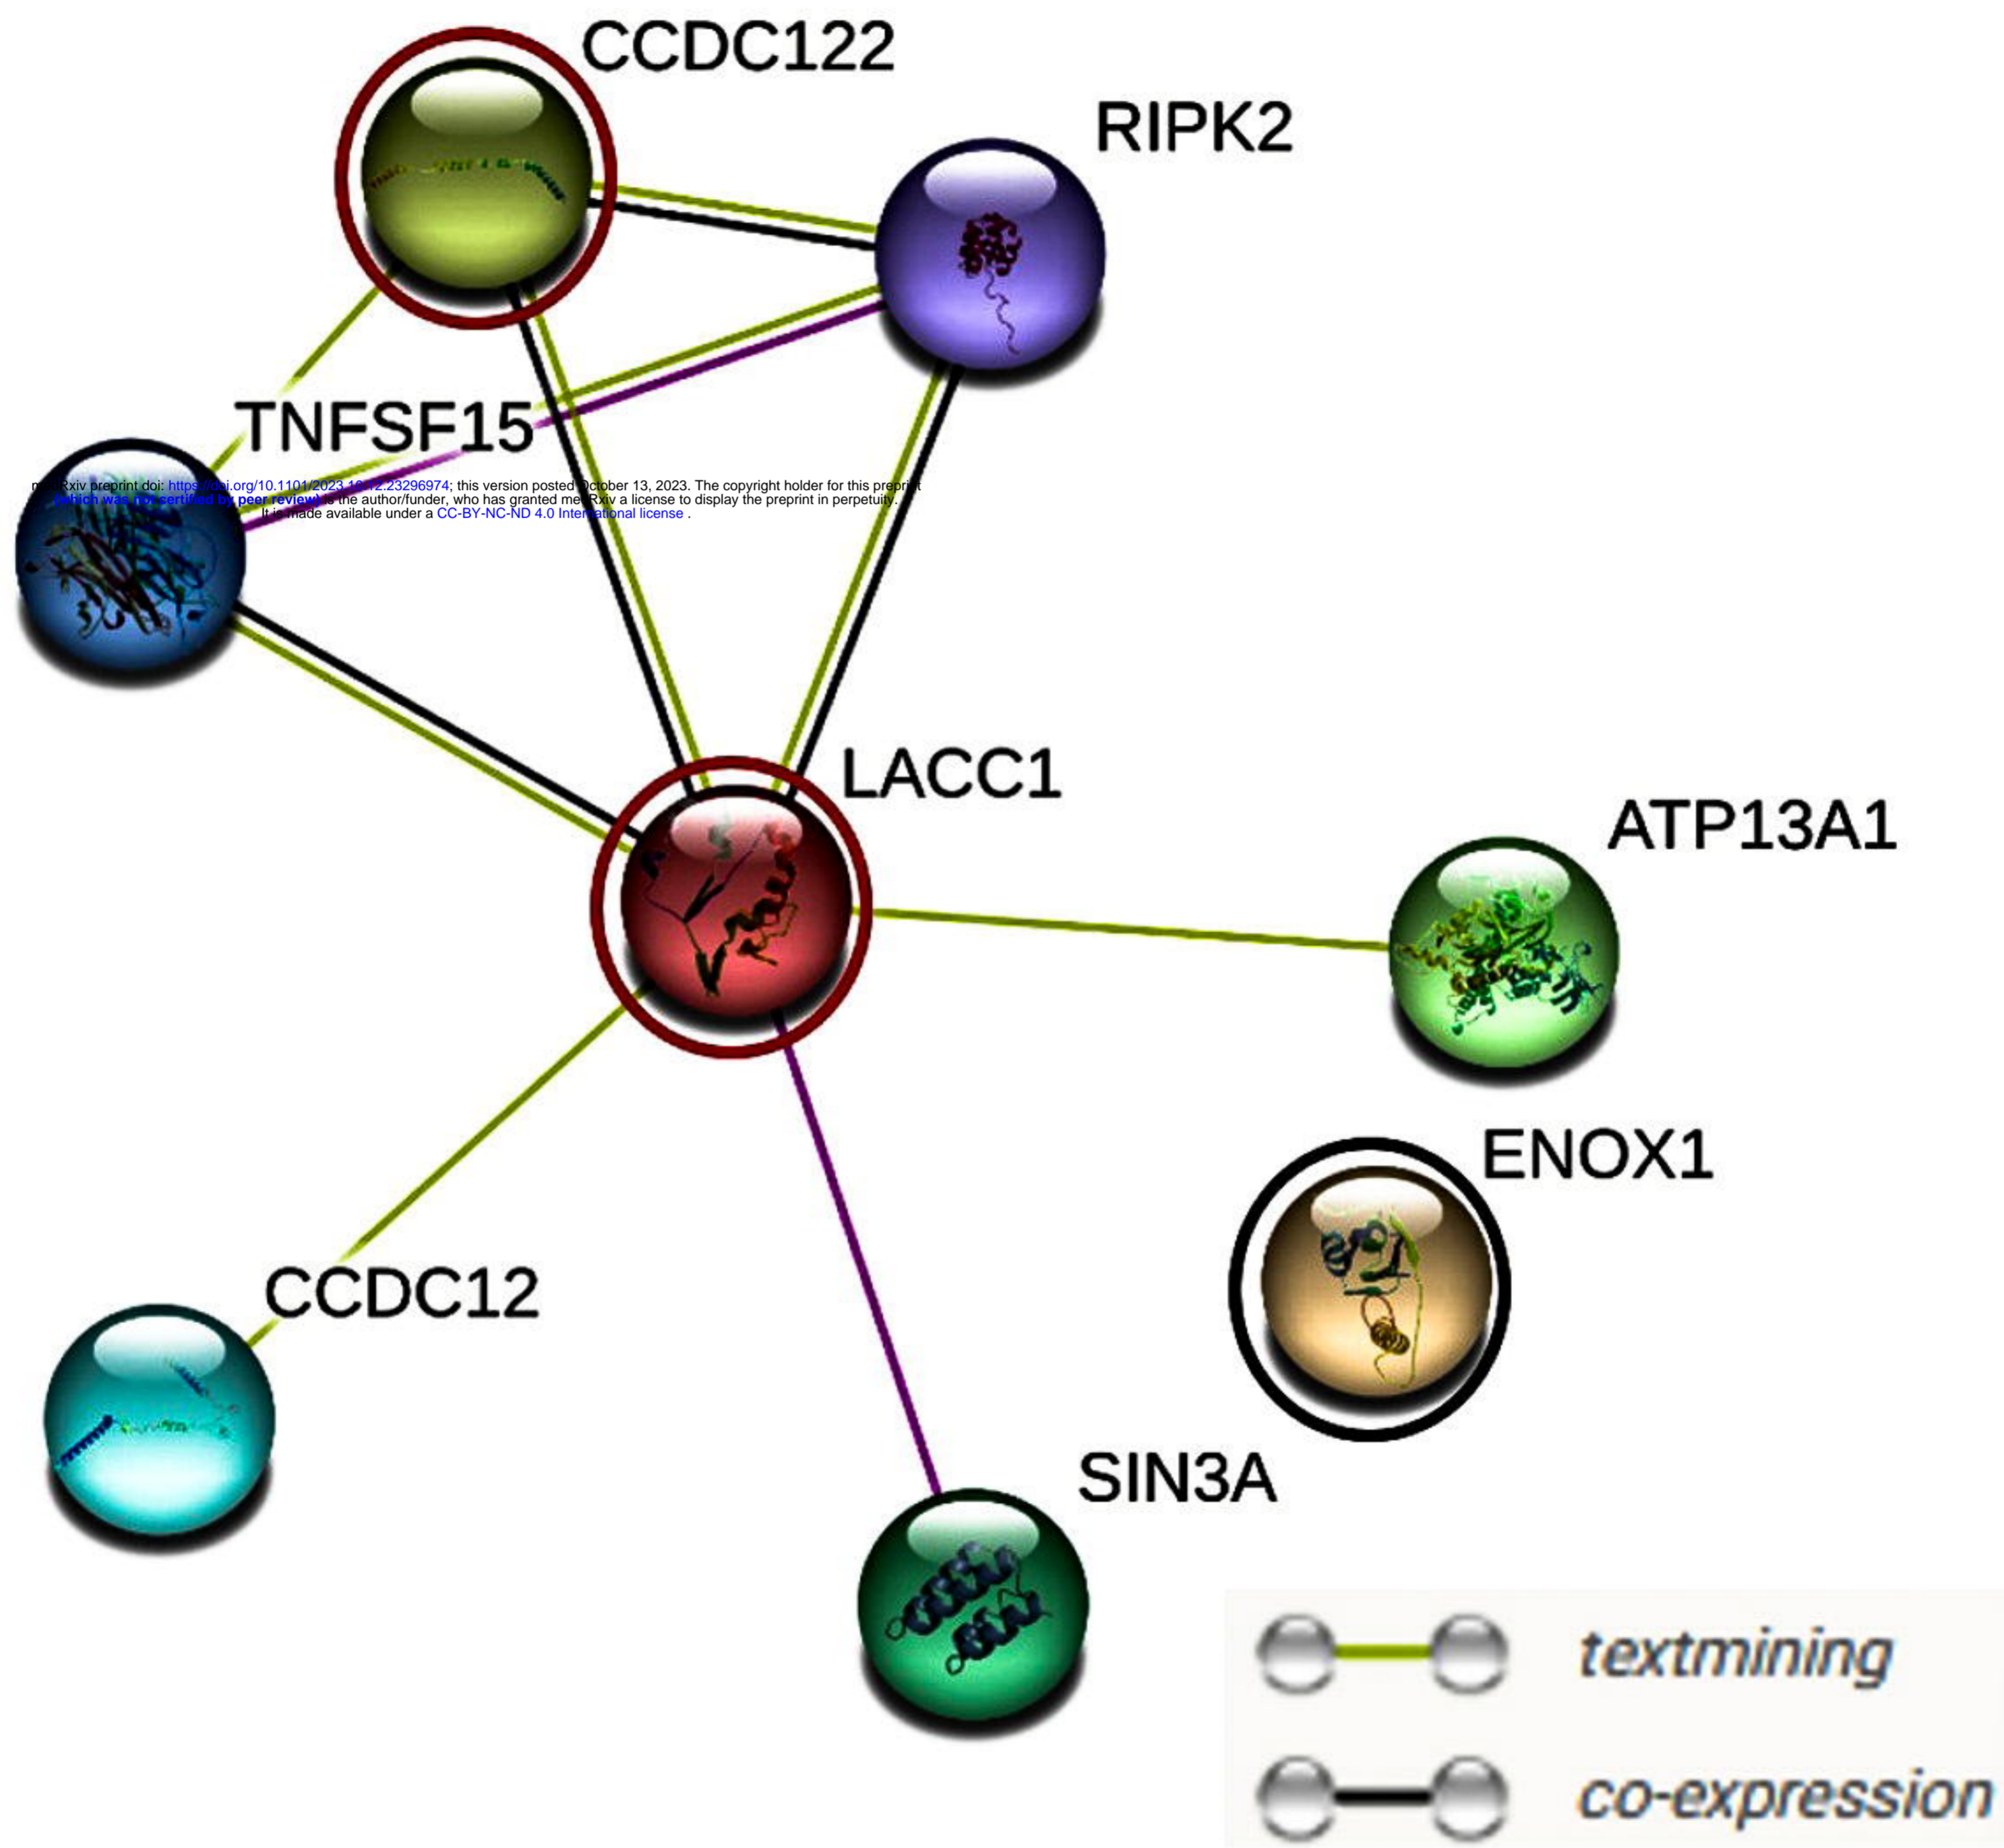

bioRxiv preprint doi: <https://doi.org/10.1101/2023.10.12.23296974>; this version posted October 13, 2023. The copyright holder for this preprint (which was not certified by peer review) is the author/funder, who has granted bioRxiv a license to display the preprint in perpetuity. It is made available under a [CC-BY-NC-ND 4.0 International license](https://creativecommons.org/licenses/by-nc-nd/4.0/).

# Estrogen Biosynthesis

**CYP19A1**

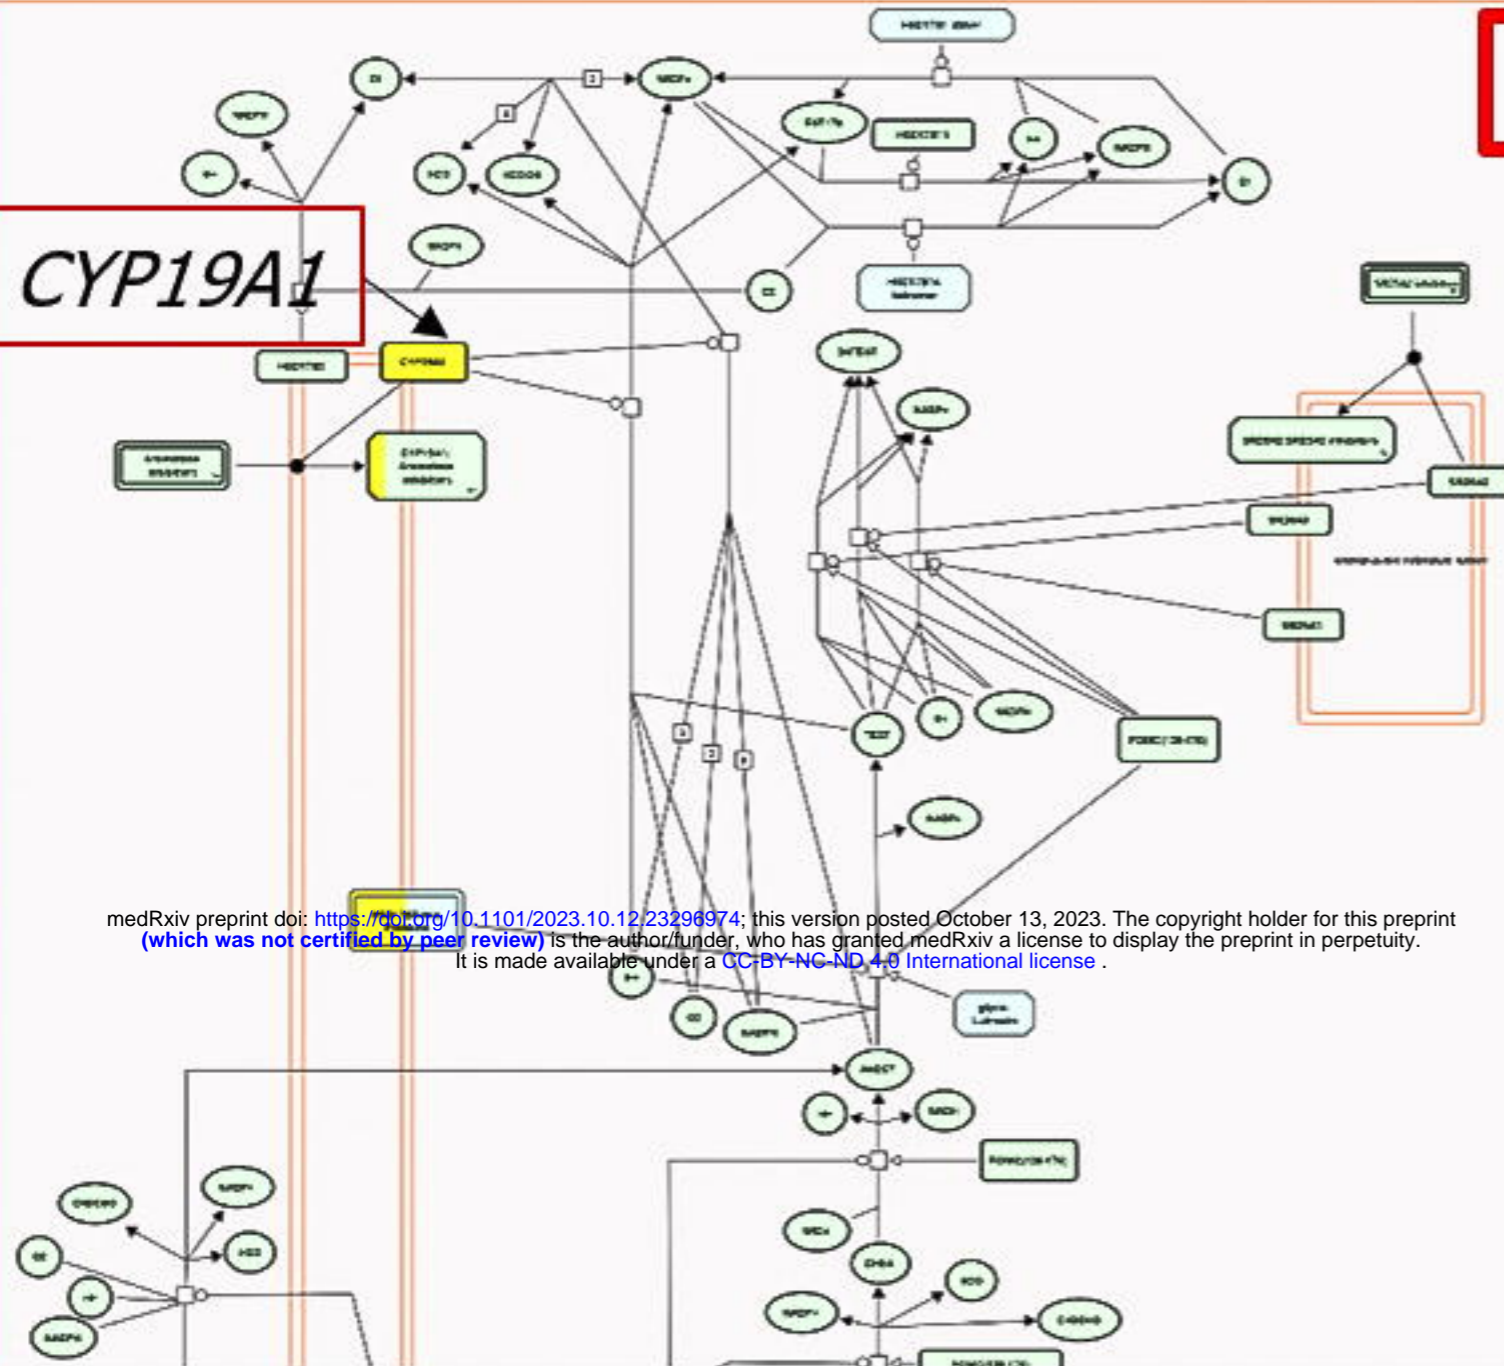

medRxiv preprint doi: <https://doi.org/10.1101/2023.10.12.23296974>; this version posted October 13, 2023. The copyright holder for this preprint (which was not certified by peer review) is the author/funder, who has granted medRxiv a license to display the preprint in perpetuity. It is made available under a [CC-BY-NC-ND 4.0 International license](https://creativecommons.org/licenses/by-nc-nd/4.0/).

**AKR1B1**

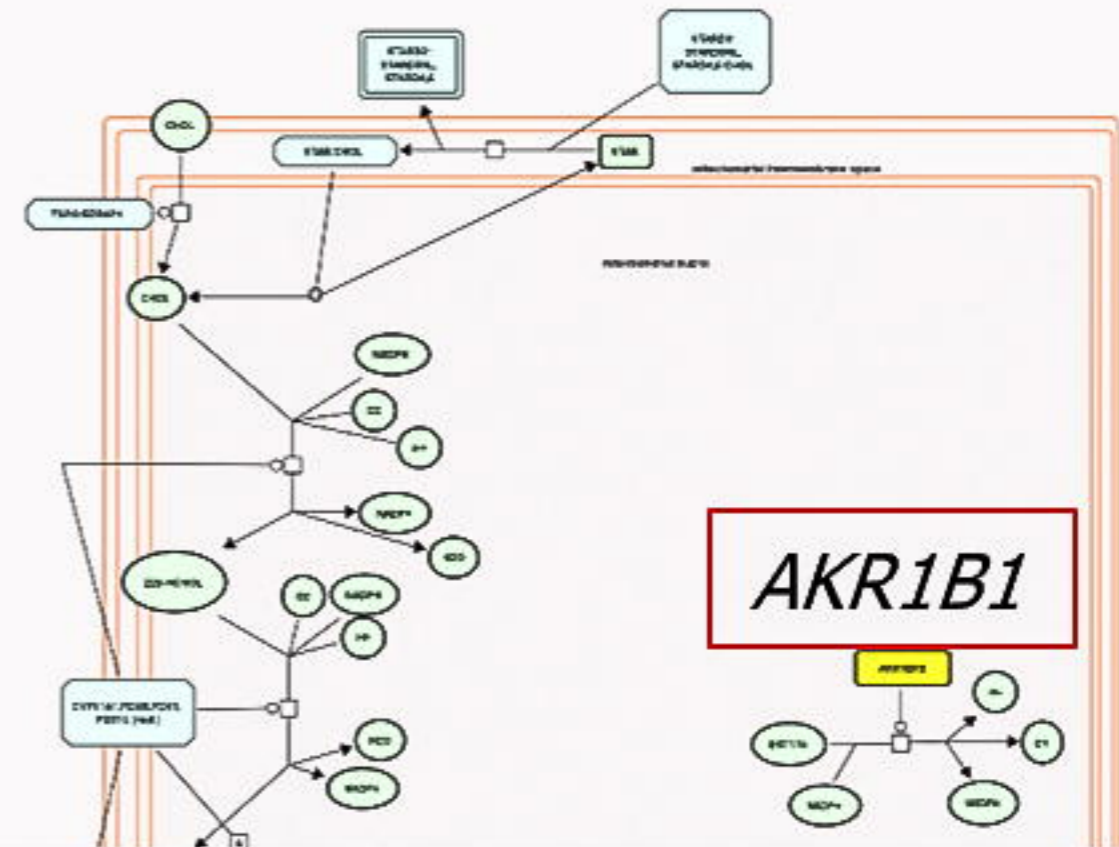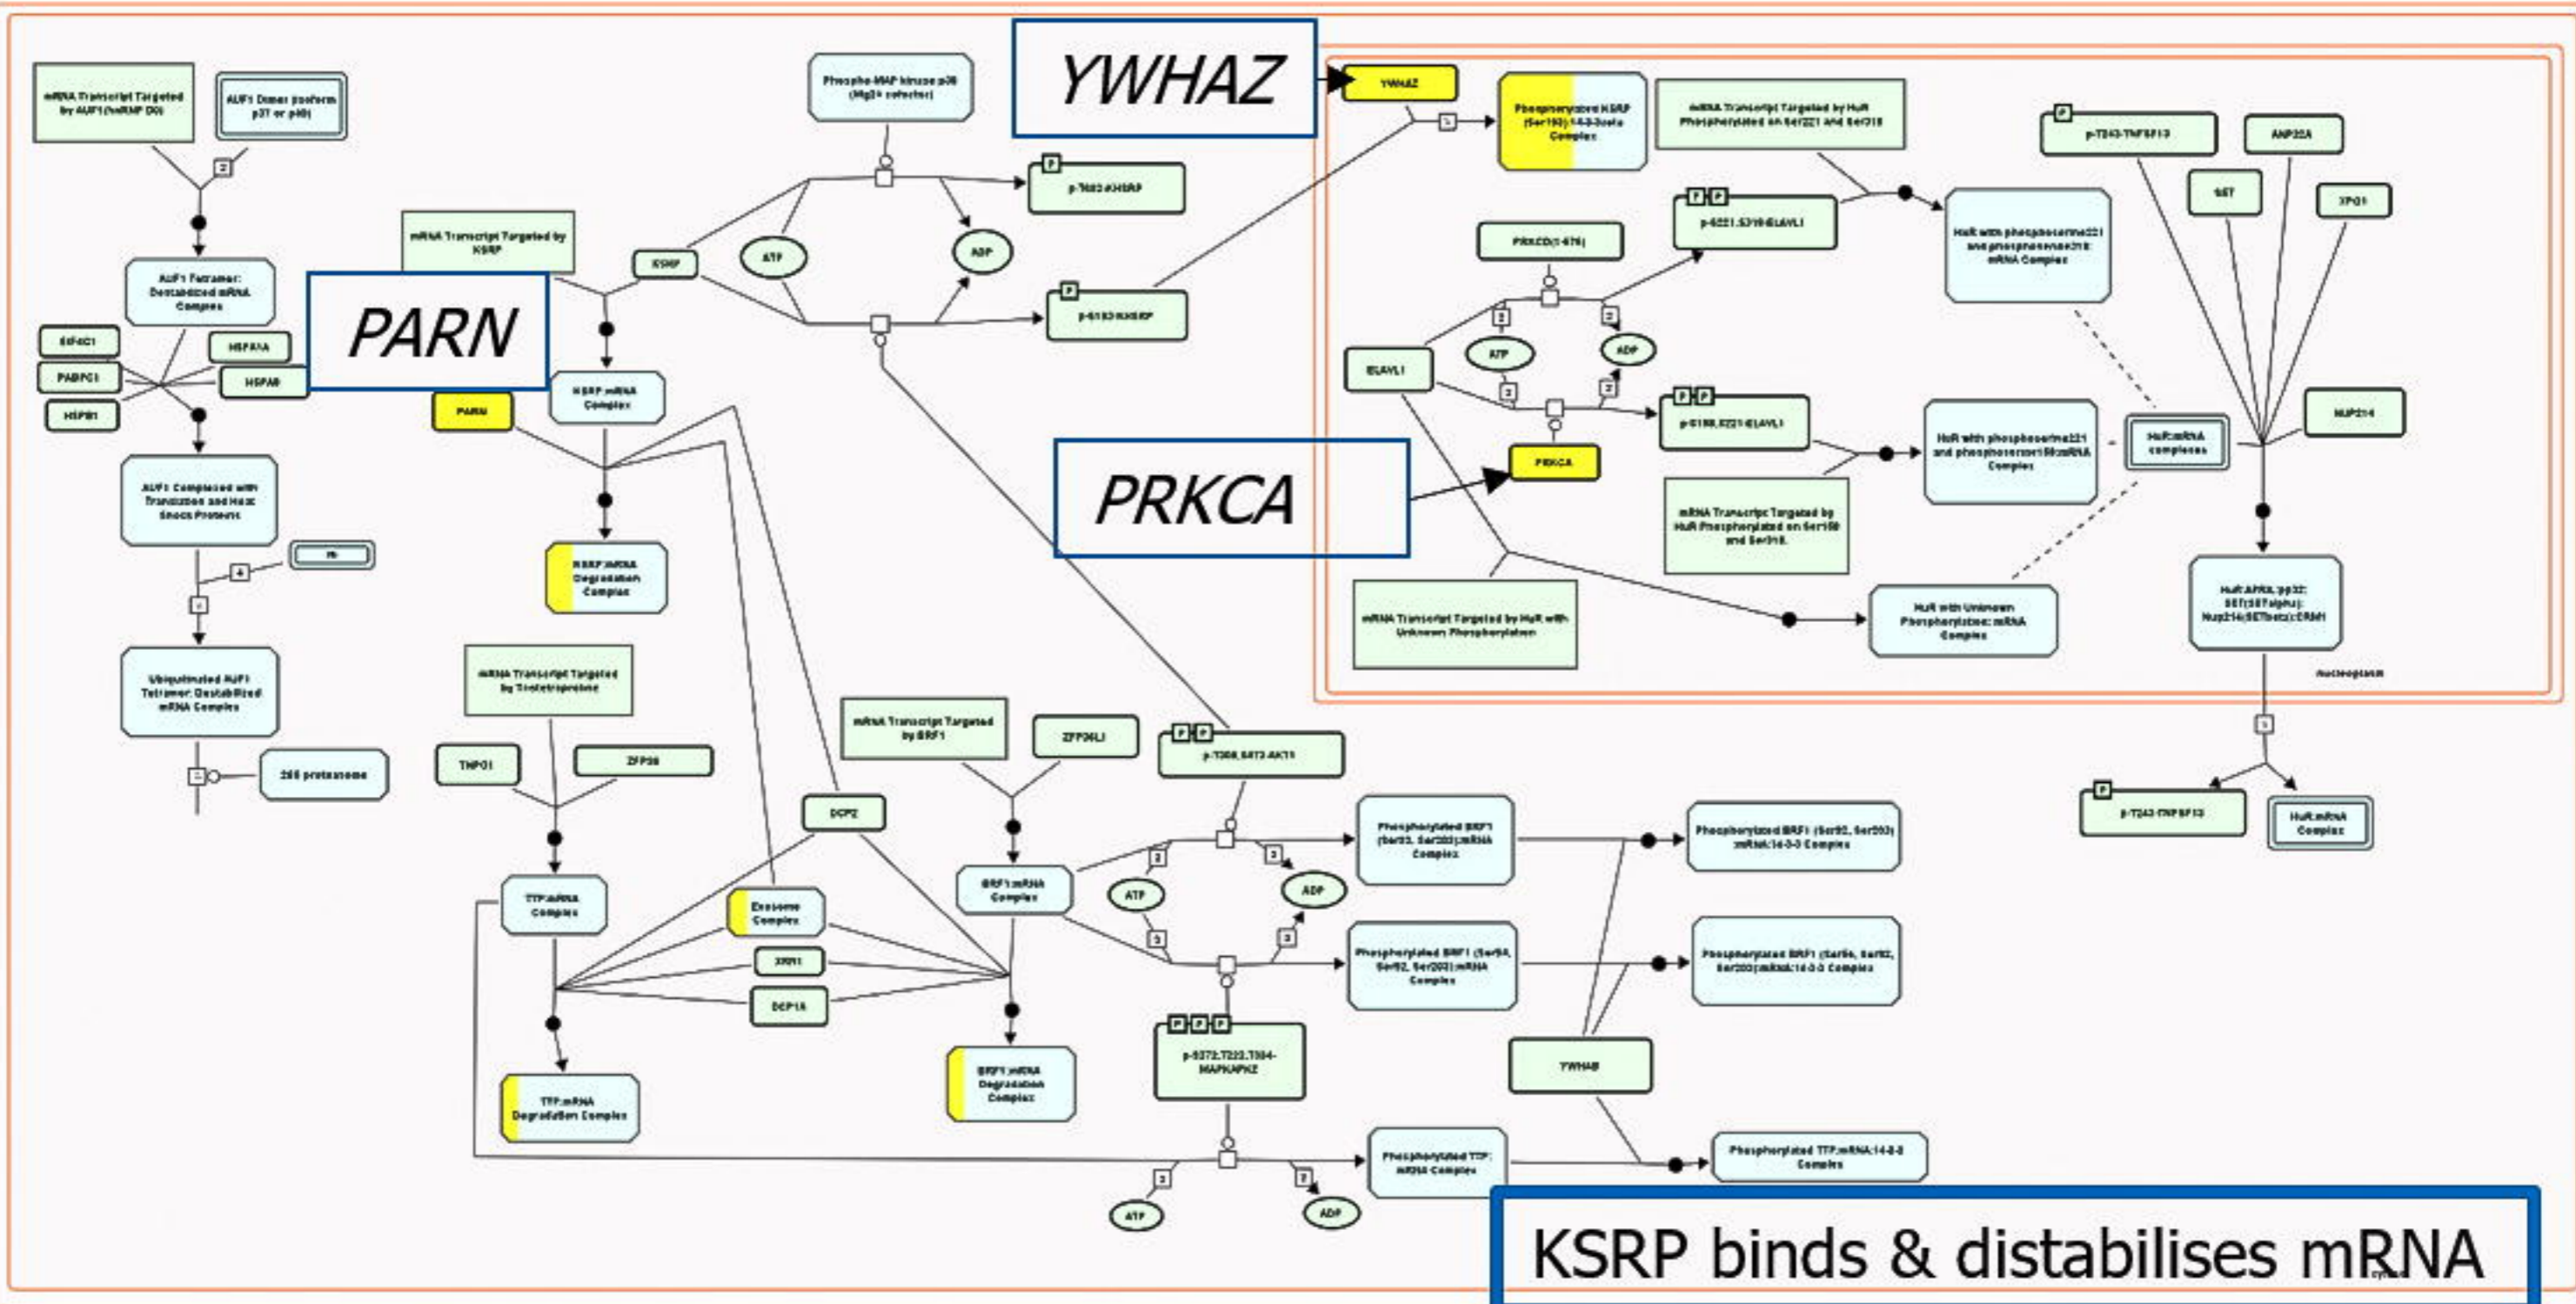

Source: http://medrxiv.org/content/10.1101/2023.10.12.23296974v1.full.pdf
